# Supplementary material for: Benzodiazepine prescribing for children, adolescents, and young adults from 2006 through 2013: A total population register-linkage study
Source: PLoS Med. 2018 Aug 7;15(8):e1002635. doi: 10.1371/journal.pmed.1002635 (PMC6080748; doi:10.1371/journal.pmed.1002635)
Supplement: S3 Table — (DOCX) [file pmed.1002635.s005.docx]

**S3 Table. BZD prescribing patterns by average daily dosage in 117,739 study participants during the study period (2006-2013)**

| **Covariate** | **Total *n*a** |  | **Average daily dosage** | | | | | | | | |
| --- | --- | --- | --- | --- | --- | --- | --- | --- | --- | --- | --- |
|  | **˂0.5 DDD (reference)** |  | **≥0.5DDD to <1.5DDD** | | |  | **≥1.5DDD** | | |
|  |  | ***n* (%)** |  | ***n* (%)** | **Crude**  **OR (95% CI)** | **Adjustedb**  **OR (95% CI)** |  | ***n* (%)** | **Crude**  **OR (95% CI)** | **Adjustedb**  **OR (95% CI)** |
| **Whole cohort** | 117,739 |  | 98,852 (83.96) |  | 15,885 (13.49) |  |  |  | 3,002 (2.55) |  |  |
| **Sex** |  |  |  |  |  |  |  |  |  |  |  |
| Females | 67,313 |  | 57,219 (85.00) |  | 8,697 (12.92) | 1.00 | 1.00 |  | 1,397 (2.08) | 1.00 | 1.00 |
| Males | 50,426 |  | 41,633 (82.56) |  | 7,188 (14.25) | 1.14 (1.10-1.17) | 1.29 (1.25-1.34) |  | 1,605 (3.18) | 1.58 (1.47-1.70) | 1.81 (1.69-1.95) |
| **Age at first BZD dispensation** |  |  |  |  |  |  |  |  |  |  |  |
| 0-11 years | 17,500 |  | 16,850 (96.29) |  | 607 (3.47) | 1.00 | 1.00 |  | 43 (0.25) | 1.00 | 1.00 |
| 12-17 years | 15,039 |  | 12,618 (83.90) |  | 2,069 (13.76) | 4.55 (4.15-5.00) | 2.34 (2.12-2.59) |  | 352 (2.34) | 10.93 (7.96-15.02) | 5.90 (4.26-8.17) |
| 18-24 years | 85,200 |  | 69,384 (81.44) |  | 13,209 (15.50) | 5.28 (4.86-5.74) | 2.77 (2.51-3.05) |  | 2,607 (3.06) | 14.72 (10.89-19.91) | 8.90 (6.47-12.23) |
| **Any lifetime psychiatric diagnosisc** | 68,476 |  | 52,308 (76.39) |  | 13,381 (19.54) | 4.75 (4.54-4.97) | 3.05 (2.91-3.20) |  | 2,787 (4.07) | 11.53 (10.03-13.26) | 7.00 (6.08-8.06) |
| **Lifetime diagnosis of epilepsyd** | 15,191 |  | 13,213 (86.98) |  | 1,635 (10.76) | 0.74 (0.70-0.79) | 1.01 (0.94-1.07) |  | 343 (2.26) | 0.84 (0.75-0.94) | 1.45 (1.27-1.64) |
| **Concurrent dispensation of any psychotropic medicatione** | 89,400 |  | 71,404 (79.87) |  | 15,088 (16.88) | 7.28 (6.77-7.82) | 3.99 (3.69-4.30) |  | 2,908 (3.25) | 11.89 (9.68-14.61) | 4.88 (3.96-6.02) |

aTotal number of individuals in each row represents 100%.

bAdjusted for all variables in the table.

cReference category is the individuals without any lifetime psychiatric diagnosis.

dReference category is the individuals without lifetime epilepsy.

eReference category is the individuals without any concurrent psychotropic medication, i.e., psychotropic medication dispensed within 6 months prior to or after BZD dispensation.

BZD, benzodiazepine or benzodiazepine-related drug; OR, odds ratio.
